1 **Structural basis of substrate recognition and catalysis by fucosyltransferase 8**

2

3 Michael A. Järvå<sup>1,2†</sup>, Marija Dramicanin<sup>1,2†</sup>, James P. Lingford<sup>1,2</sup>, Runyu Mao<sup>1,2</sup>, Alan John<sup>1,2</sup>, Kate  
4 Jarman<sup>1,2</sup>, Rhys W. Grinter<sup>3</sup>, and Ethan D. Goddard-Borger<sup>1,2\*</sup>

5

6 <sup>1</sup> The Walter and Eliza Hall Institute of Medical Research, Parkville, Victoria 3052, Australia.

7 <sup>2</sup> Department of Medical Biology, University of Melbourne, Parkville, Victoria 3010, Australia.

8 <sup>3</sup> Department of Microbiology, Monash Biomedicine Discovery Institute, Monash University,  
9 Clayton, VIC 3800, Australia.

10

11 † These authors contributed equally

12

13 \* Correspondence and requests for materials should be addressed to E.D.G.-B. ([goddard-  
14 borger.e@wehi.edu.au](mailto:goddard-borger.e@wehi.edu.au)).

15

16 **Keywords**

17 glycosyltransferase, N-glycosylation, core fucose, enzyme mechanism, structural biology

## 18 **Abstract**

19 Fucosylation of the inner-most N-acetyl-glucosamine (GlcNAc) of N-glycans by fucosyltransferase 8  
20 (FUT8) is an important step in the maturation of complex and hybrid N-glycans. This simple  
21 modification can have a dramatic impact on the activity and half-life of glycoproteins. These effects  
22 are relevant to understanding the invasiveness of some cancers, the development of monoclonal  
23 antibody therapeutics, and to a congenital disorder of glycosylation. The acceptor substrate preferences  
24 of FUT8 are well characterised and provide a framework for understanding N-glycan maturation in  
25 the Golgi, however the structural basis for these substrate preferences and the mechanism through  
26 which catalysis is achieved remains unknown. Here, we describe several structures of mouse and  
27 human FUT8 in the apo state and in complex with guanosine diphosphate (GDP), a mimic of the donor  
28 substrate, and a glycopeptide acceptor substrate. These structures provide insights into: a unique  
29 conformational change associated with donor substrate binding; common strategies employed by  
30 fucosyltransferases to coordinate GDP; features that define acceptor substrate preferences; and a likely  
31 mechanism for enzyme catalysis. Together with molecular dynamics simulations, the structures also  
32 reveal how FUT8 dimerisation plays an important role in defining the acceptor substrate binding site.  
33 Collectively, this information significantly builds on our understanding of the core-fucosylation  
34 process.

## 36 **Introduction**

37 Fucosyltransferase 8 (FUT8) is the mammalian  $\alpha$ -1,6-fucosyltransferase responsible for modifying the  
38 inner-most (reducing-end) GlcNAc of hybrid and complex N-glycans. This modification, referred to  
39 as core-fucosylation, is ubiquitous throughout mammalian tissues and represents an important step in  
40 the maturation of complex N-glycans within the Golgi apparatus. Core fucosylation modulates the  
41 activity of many cell surface receptors, including: TGF $\beta$ 1R<sup>1,2</sup>, EGFR<sup>3</sup>, BCR<sup>4</sup>, TCR<sup>5,6</sup>, CD14-mediated  
42 TLR2/4 signalling<sup>7,8</sup>, and PD-1<sup>9</sup>. It also modulates the affinity of ligands for their receptors, the most  
43 notable example being the role that core fucose plays in decreasing the affinity of immunoglobulin G  
44 (IgG) for Fc $\gamma$ RIIIa<sup>10,11</sup>. This latter phenomenon has inspired the development of next-generation  
45 therapeutic monoclonal antibodies that more effectively engage Fc $\gamma$ RIIIa and demonstrate superior  
46 antibody-dependent cellular cytotoxicity (ADCC)<sup>11,12</sup>. Recently, dectin-I was identified as the first  
47 endogenous lectin that specifically recognises core fucose<sup>13</sup>. Collectively, these and other findings  
48 demonstrate that FUT8 plays a central role in modulating the activity of many cell-surface receptors.

49 Within mice, loss of function mutations in FUT8 result in severe growth retardation and the  
50 development of an emphysema-like lung phenotype, purportedly due to dysregulation of TGF- $\beta$ 1 and

51 EGFR signalling<sup>1, 14</sup>. These animals also exhibited behavioural abnormalities<sup>15</sup>. Many of these  
52 phenotypes are also observed in patients with the recently described FUT8 congenital disorder of  
53 glycosylation (CDG-FUT8)<sup>16</sup>. In contrast to CDG-FUT8, which features the ablation of FUT8 activity,  
54 many cancers upregulate FUT8 expression and this correlates with a poor  
55 prognosis<sup>17</sup>. In melanomas, increased FUT8 activity stabilises L1CAM to promote metastasis<sup>18</sup>.  
56 Metastasis is also promoted by FUT8 in breast cancers, where increased core-fucosylation of TGF $\beta$ 1R  
57 promotes strong constitutive signalling through this receptor and tumour cell migration<sup>19</sup>. The  
58 increased core fucosylation of  $\alpha$ -fetoprotein is also a well-established biomarker of hepatocellular  
59 carcinoma (HCC)<sup>20</sup>.

60 Some have speculated that FUT8 antagonists may have therapeutic potential for the treatment  
61 of cancer<sup>9,18</sup>, though questions remain around how a hypothetical FUT8 antagonist might impact host  
62 immune responses to tumour cells. Regardless, no drug-like small molecule inhibitors have yet been  
63 reported for FUT8, or any other human fucosyltransferase (FUT). To some degree, drug discovery  
64 efforts are impeded by a limited structural understanding of this enzyme and the mechanism it employs  
65 to perform core fucosylation. The only reported FUT8 structure possesses no bound ligands,<sup>21</sup> and our  
66 only insights into donor and acceptor substrate binding come from STD-NMR, molecular dynamics  
67 and docking studies<sup>22, 23</sup>. To gain a thorough understanding of how FUT8 recognises both its donor  
68 and acceptor substrates to catalyse core fucosylation, we revisited the structural biology of FUT8. The  
69 structures we obtained provide fresh insights into the conformational dynamics and molecular  
70 interactions associated with catalysis.

71

## 72 **Results**

### 73 *Structural insights into nucleotide recognition by FUT8*

74 A truncated human FUT8 (HsFUT8<sub>105-575</sub>) construct, which is missing the N-terminal transmembrane  
75 domain and unstructured region, was expressed in Sf21 insect cells. The activity of the purified protein  
76 was verified using the GDP-Glo<sup>TM</sup> glycosyltransferase assay with an asialo-agalacto-biantennary  
77 glycopeptide (A2SGP) derived from chicken eggs as an acceptor substrate (**Figure 1A**). Using this  
78 assay, we determined a  $K_M$  of 4.2  $\mu$ M for GDP-fucose (GDP-Fuc) and 12  $\mu$ M for A2SGP (**Figure**  
79 **1B**), which was in broad agreement with previously reported values<sup>24</sup>.

80 Since glycosyltransferases rapidly hydrolyse their sugar nucleotide donor substrates on a  
81 protein crystallisation time-scale, we attempted to co-crystallise HsFUT8 with GDP rather than GDP-  
82 Fuc. These attempts failed to provide any crystals of the complex, though we did obtain crystals of the  
83 apo form that enabled a re-determination of the unliganded structure at higher resolution (2.28Å) than

84 the existing structure (2.61 Å for PDB ID 2DE0) with superior refinement statistics (**Table 1**)<sup>21</sup>. As an  
85 alternative approach, we cloned and expressed the mouse FUT8 (MmFUT8<sub>68-575</sub>) using a similar  
86 method as for the human protein. MmFUT8 is 96.6% identical to the human homologue over the length  
87 of this truncated construct (**Figure S1**). Extensive crystallisation screens with this slightly different  
88 protein and GDP provided crystals that yielded a structure of MmFUT8 in its apo (1.80Å) and GDP-  
89 bound (2.50Å) forms (**Table 1**).

90 The overall fold of these three FUT8 crystal structures is as previously described<sup>21</sup>: an N-  
91 terminal coiled-coil domain, followed by two Rossman folds forming a GDP-substrate-binding site,  
92 and a C-terminal SH3-domain of unknown function, as illustrated for MmFUT8-GDP in **Figure 1C**.  
93 The backbone RMSD between the four structures is low, <0.4Å, (**Figure S2**). The most notable  
94 backbone perturbations observed are for two loops, Arg365-Ala375 (loop A) and Asp429-Asn446  
95 (loop B), which are disordered or displaced in the apo-MmFUT8 and apo-HsFUT8 structure but  
96 become ordered and completely encapsulate GDP upon binding (**Figure 1D,E**). This reorganisation  
97 involves the creation of several new interactions between both loops, most notably a salt bridge  
98 between Asp368 and Arg365 of loop A and Arg441 of loop B (**Figure 1E**). Arg365 also forms a salt  
99 bridge with the beta-phosphate of GDP, providing a link between ligand binding and organisation of  
100 the encapsulating loops (**Figure 1D,E**). Mutation of Arg365 to Ala abolishes FUT8 activity<sup>25</sup>,  
101 confirming that this residue plays a key role in organising the encapsulating loops around the  
102 nucleotide. A detailed list of all GDP-FUT8 hydrogen bonds is provided in **Figure S3**. Other  
103 noteworthy interactions include those between Asp453/His363 and the guanine base and the  
104 interactions between the ribose hydroxyl groups and Tyr250 (**Figure 1D**).

105 The conformational change associated with GDP encapsulation by FUT8 is unique amongst  
106 the FUTs studied to date. It results in burial of 96% of GDP's surface area (**Figure S3**). This is  
107 comparable to, or slightly higher than, that observed for other FUT:GDP complexes, including:  
108 AtFUT1 (95%)<sup>26</sup>, NodZ (83%)<sup>27</sup>, CePOFUT1 (90%)<sup>28</sup>, MmPOFUT1 (86%)<sup>29</sup> and CePOFUT2 (95%)<sup>30</sup>  
109 (**Figure 2**). Remarkably, the conformational pose of the GDP ligand and GDP-FUT interactions are  
110 nearly identical in all FUTs, including FUT8, despite significant divergence in sequence and domain  
111 architecture. Residues analogous to FUT8's Ser469, Arg365, Asp453, and His363 are conserved at a  
112 structural level across all FUTs (**Figure 2**). This observation will have important consequences for the  
113 development of competitive inhibitors of the FUTs.

114  
115 *Structural insights into N-glycan acceptor substrate recognition by FUT8*

116 Co-crystallisation of HsFUT8<sub>105-575</sub> with GDP and the A2SGP glycopeptide acceptor substrate  
117 provided crystals that yielded a structure with four HsFUT8 monomers in the asymmetric unit. All

118 molecules were bound to A2SGP but only one molecule in each dimer pair also bound GDP. As such,  
119 this structure provided information for the FUT8:GDP:A2SGP ternary complex and the FUT8:A2SGP  
120 binary complex. The apparent ability of GDP and A2SGP to bind FUT8 independently of each other  
121 is consistent with a rapid equilibrium random mechanism, which has been previously been established  
122 for FUT8<sup>24</sup>.

123 All sugars of the A2SGP substrate, and the Asn side chain to which they were attached, were  
124 resolved and modelled for each monomer (**Figure 3A**). Upon binding to FUT8, the N-glycan buries  
125 44% of its surface area. Hydrogen-bonding interactions between FUT8 and A2SGP are almost  
126 exclusively between the enzyme and the GlcNAc units comprising the core chitobiose unit and non-  
127 reducing ends of the bisected glycan (**Figure 3A,B**): the mannose units do not make any notable  
128 hydrogen-bonding interactions with FUT8. For the two protein chains in the asymmetric unit without  
129 GDP bound, loops A and B remain disordered, as for the apo structures. However, in the ternary  
130 complex with GDP bound, these loops encapsulate GDP, as observed for the MmFUT8-GDP structure.  
131 Inspection of the region between the beta-phosphate of GDP and the 6-hydroxyl group of the innermost  
132 GlcNAc residue of A2SGP provides insights into which residues play a role in catalysis. Glu373 forms  
133 an intimate hydrogen bond (2.3 Å) with the 6-hydroxyl group and also interacts with Lys369, which  
134 in turn forms an intimate contact with the beta-phosphate of GDP (**Figure 3C**). This suggests that  
135 Glu273 acts as the catalytic base for catalysis and is capable of relaying a proton through Lys369 to  
136 the departing beta-phosphate of GDP. In this way, the Glu273/Lys369 pair act as proton conduit and  
137 catalytic base/acid, respectively.

138 Two previous studies have explored the acceptor substrate specificity of FUT8 to ascertain  
139 what features promote or impair FUT8 activity<sup>31, 32</sup> and these results are summarised in **Figure 3D**. It  
140 is clear through comparison to our structure that a bisecting GlcNAc would be sterically occluded by  
141 the SH3 domain of FUT8 (**Figure 3A**), consistent with this modification's ability to block core-  
142 fucosylation<sup>31, 32</sup>. Modifications of the  $\alpha$ 6-branch of the glycan are well-tolerated by FUT8, and it is  
143 clear from our structure that there is sufficient space to accommodate most types of truncation,  
144 elongation or branching at this position. The one exception is elongation with a terminal  $\beta$ -1,4-  
145 GlcNAc, which would introduce steric clashes with the SH3 domain. Modification of the  $\alpha$ 3-branch  
146 is not well-tolerated by FUT8, and all typical elongation or branching residues (**Figure 3D**) introduce  
147 steric clashes that would preclude binding. Notably, FUT8 activity requires the terminal  $\beta$ -1,2-GlcNAc  
148 of the  $\alpha$ 3-branch, suggesting that the intimate hydrogen bond between His353 and the 6-hydroxyl  
149 group of this GlcNAc is an important contributor to acceptor substrate binding.

150

151 *FUT8 dimerisation and orientation of SH3-domain for acceptor substrate recognition*

152 In the asymmetric units of all structures determined here, MmFUT8 and HsFUT8 formed an apparent  
153 dimer through the formation of a four-helix bundle from their N-terminal coiled-coil domains. These  
154 helices interact with their neighbour's SH3-domain (**Figure 4A**). This dimer could be observed in the  
155 previously determined apo structure of FUT8<sup>21</sup>, yet the structure was reported on as a monomer. Other  
156 publications have reported that HsFUT8 is a monomer in solution, based on size exclusion  
157 chromatography experiments<sup>33</sup>, and this has influenced the way in which molecular dynamic and  
158 docking simulations of FUT8 have been conducted<sup>22, 23</sup>, potentially compromising their conclusions.  
159 To address this inconsistency in the literature, we performed SEC-SAXS on FUT8 (**Figure 4B,C**),  
160 which conclusively demonstrated that FUT8 exists as a dimer in solution. The buried surface area for  
161 dimerisation was similar for all four structures reported here (**Table S4**), irrespective of what ligands  
162 were bound, and involves the same residues forming inter-chain salt bridges and hydrogen bonds  
163 (**Figure 4A**).

164 As mentioned, previous docking and molecular dynamics simulations were conducted based  
165 on the assumption that FUT8 is a monomer and suggested that the SH3 domain moves significantly  
166 after 20 ns of simulation<sup>22</sup>. Since the SH3 domain plays an important role in recognising the acceptor  
167 substrate, this would appear to be deleterious for catalysis. However, when considered as a dimer  
168 complex, the SH3-domain clearly binds the neighbouring chain's N-terminal coiled-coil domain,  
169 which would appear to lock the SH3 domain in place (**Figure 4A**). To address this discrepancy, we  
170 performed MD simulations of unliganded FUT8 in both the monomeric and dimeric state over a period  
171 of 40 and 30 ns, respectively (**Figure 5**). Movements in the N-terminal coiled-coil domain and SH3  
172 domain in the monomeric structure were replicated, with this conformational change enabling the  
173 burial of hydrophobic residues and disrupting the acceptor-binding surface of the enzyme. However,  
174 in the dimeric structure, no such movements were observed (**Figure 5**). In fact, for the dimer, the only  
175 significant motion observed on this time scale were in the active site loops A and B that encapsulate  
176 GDP. This data suggests that dimerisation of FUT8 is an important adaptation for buttressing the SH3  
177 domains to maintain an extended bifurcated surface that can accommodate the bisected N-glycan  
178 acceptor substrate.

179

180 **Discussion**

181 This collection of structures has revealed a unique conformational change in FUT8 associated with  
182 capturing GDP, and presumably its donor substrate GDP-Fuc. Arg365 plays a pivotal role in this  
183 process by forming a salt bridge with the beta-phosphate of GDP and Asp368/Arg441 of the mobile  
184 loops. The critical importance of this residue for catalysis is supported by previous mutagenesis

185 studies<sup>25</sup>. Despite this unusual feature, once GDP is bound, its spatial orientation and the interactions  
186 it makes with FUT8 are largely the same as for other FUTs<sup>26-30</sup>. This observation is particularly  
187 relevant to those seeking to develop competitive inhibitors of FUTs: selectivity may be difficult to  
188 obtain with GDP mimics or molecular scaffolds that only interact with the GDP-binding site. On the  
189 other hand, these commonalities suggest that small molecule scaffolds may exist with pan-FUT  
190 inhibitory activity and that these might be adapted into selective inhibitors by exploring the acceptor  
191 binding site.

192 Original investigations into FUT8 mechanism by Ihara and co-workers indicated that FUT8  
193 utilises a rapid equilibrium random mechanism<sup>24</sup>. This model postulates that substrates can bind  
194 independently to the enzyme in any order to form the Michaelis complex. The fact that we were able  
195 to obtain structures of FUT8 bound to acceptor or GDP alone, as well as the ternary complex, supports  
196 this mechanistic model. Our structures also reveal that there are no significant structural  
197 rearrangements associated with N-glycan binding and that the ordering of loops A and B upon GDP  
198 binding occur independently of the N-glycan binding site. Perhaps the greatest insights obtained from  
199 our structures, with respect to enzyme mechanism, is the realisation that the Glu273/Lys369 residue  
200 pair are the key catalytic residues. Our ternary complex clearly illustrates that Glu273 forms a close  
201 contact with the 6-hydroxyl group of the innermost GlcNAc of the N-glycan acceptor substrate, and  
202 that its basicity is modulated through interactions with Lys369. As such, Glu273 is the clear catalytic  
203 base residue. Concomitantly, Lys369 is able to shuttle a proton from Glu273 to the beta-phosphate of  
204 GDP, with which it forms a salt bridge, to facilitate departure of GDP from GDP-Fuc, enabling  
205 electrophilic migration of fucose onto the hydroxyl group nucleophile of the acceptor substrate.

206 With core-fucosylation playing such an important role in the function of proteins and the  
207 maturation of N-glycans, a great deal of effort has been invested in profiling the acceptor substrate  
208 preferences of this enzyme. Our structures provide a basis for understanding the vagaries of FUT8  
209 substrate preference<sup>31,32</sup>. What is clear from this work is that the SH3 domain of FUT8 plays a defining  
210 role in recognising N-glycan acceptor substrates. Modifications to the  $\alpha$ 3 branch of an N-glycan or a  
211 bisecting GlcNAc introduces steric clashes with the SH3 domain that prevents them from binding to  
212 FUT8. His535 of the SH3 domain also appears to form a crucial hydrogen-bond with the non-reducing  
213 end GlcNAc of N-glycan substrates. The importance of this SH3 domain to forming the acceptor  
214 substrate binding site necessitates its rigidity. Our molecular dynamics simulations support the  
215 hypothesis this requirement for rigidity is met by FUT8 dimerisation, there the N-terminal coiled-coil  
216 domains of one chain buttress the C-terminal SH3 domain of the other chain, to provide FUT8 with a  
217 rigid acceptor substrate binding site.

218

## 219 **Conclusion**

220 FUT8 possess a unique method of capturing its GDP-Fuc donor substrate by using two mobile loops  
221 to encapsulate the nucleotide portion of this molecule: this process is largely driven by Arg365, which  
222 drives salt bridge formation between GDP and the two mobiles loops. This unique feature aside, FUT8  
223 recognises GDP in much the same way as other FUTs, suggesting that all of these enzymes might be  
224 targetable with a common chemical scaffold. A ternary complex of FUT8, GDP, and N-glycan  
225 acceptor substrate revealed that Glu273 and Lys369 play a direct role in catalysis, with Glu273 acting  
226 as catalytic base, and Lys369 relaying a proton from Glu273 to the departing phosphate of the GDP-  
227 Fuc substrate. This complex also revealed the importance of the SH3 domain in providing a bifurcated  
228 surface for N-glycan recognition and in defining the acceptor substrate scope of FUT8. The importance  
229 of the SH3 domain in substrate binding appears to have driven the evolution of FUT8 as a dimer,  
230 which restricts the movement of the SH3 domain and stabilises the acceptor-binding subsite.

231

## 232 **Materials and Methods**

### 233 *Cloning, expression, and purification of human and mouse FUT8*

234 A gene encoding an N-terminal gp67 signal peptide, residues 105-585 of human FUT8 (UniProt ID:  
235 Q9BYC5) and a C-terminal His<sub>10</sub> tag (**Table S1**) was synthesised and cloned into the pFastBac-1  
236 vector (ThermoFisher) using *RsrIII/XhoI*. A gene encoding an N-terminal gp67 signal peptide, V5  
237 epitope tag, His<sub>10</sub> tag, factor Xa site, and residues 68-585 of mouse FUT8 (UniProt ID: Q9WTS2)  
238 (**Table S1**) was synthesised and cloned into the pFastBac-1 vector (ThermoFisher) using *RsrIII/XhoI*.  
239 Both constructs were expressed in Sf21 insect cells (Thermo Fisher) using the Bac-to-Bac  
240 Baculovirus Expression System (Thermo Fisher) by following the manufacturer's protocol. Briefly,  
241 each plasmid was transformed into chemically competent DH10Bac *E. coli* cells (Thermo Fisher) and  
242 positive clones identified through a blue-white screen. Bacmid was prepared from these cells and  
243 transfected into Sf21 insect cells conditioned in Insect-XPRESS Protein-free Insect Cell Medium with  
244 L-glutamine (Lonza Ltd.) using the Cellfectin II reagent (ThermoFisher). Virus was passaged on Sf21  
245 insect cells three times. For protein expression, 1 litre of Sf21 cells at a density of  $1-2 \times 10^6$  cells.ml<sup>-1</sup>  
246 was infected with 30 ml of the P3 baculovirus and cultured at 27 °C for 72 h. The cells were pelleted  
247 by centrifugation (8,000×g, 20 min, 4 °C) and the supernatant collected. 10× buffer solution (112 ml,  
248 500 mM Tris pH 7.5, 3M NaCl) was added to the supernatant before it was filtered through a 0.22 µm  
249 membrane. The buffered and filtered supernatant was passed through a pre-equilibrated 5 mL HisTrap  
250 Excel column (GE Healthcare). The column was washed with 20 column volumes of 50 mM Tris pH



251 7.5, 300 mM NaCl, followed by a one-step elution in 50 mM Tris pH 7.5, 300 mM NaCl, 500 mM  
252 imidazole to elute FUT8 from the column. Fractions containing protein, as judged by SDS-PAGE,  
253 were pooled and further purified by size exclusion chromatography (SEC) using a HiLoad 16/600  
254 Superdex 200 column (GE Healthcare) equilibrated in 50 mM Tris pH 7.5, 150 mM NaCl. For  
255 MmFUT8<sub>68-575</sub>, the N-terminal tags were removed using Factor Xa protease (New England BioLabs)  
256 by incubating in 50 mM Tris pH 6.5, 150 mM NaCl, 2 mM CaCl<sub>2</sub> overnight at room temperature. For  
257 HsFUT8<sub>105-575</sub>, the C-terminal His<sub>10</sub> affinity tag was removed using Carboxypeptidase A (Merck) by  
258 incubating in 50 mM Tris pH 7.5, 150 mM NaCl overnight at room temperature. Protease-treated  
259 MmFUT8<sub>68-575</sub> and HsFUT8<sub>105-575</sub> were purified by running the reactions through a pre-equilibrated 1  
260 mL HisTrap Excel column (GE Healthcare) and performing SEC on the column flow-through using a  
261 Superdex 200 Increase 10/300 GL column (GE Healthcare) equilibrated in 50 mM Tris pH 7.5, 150  
262 mM NaCl. Concentration of the proteins was accomplished using Amicon centrifugal filters, NMWL  
263 10 kDa (Merk-Millipore). Protein yields varied between batches but were always in the region of 5-  
264 10 mg per litre of cell culture.

265

#### 266 *GDP-Glo assay of FUT8 activity*

267 FUT8 activity was assayed using the GDP-Glo™ Glycosyltransferase Assay (Promega) with 3 µl  
268 reactions being conducted in a 1536-well microtiter plate. Reactions contained assay buffer (50 mM  
269 Tris pH 7, 100 mM NaCl, 0.01% Triton X-100 and 0.1% BSA), 5 µM A2SGP (Fushimi Pharmaceutical  
270 Co.), 10 µM GDP-Fuc and 5 nM FUT8, unless otherwise stated. After incubation for 20 min at room  
271 temperature, the reactions were stopped by the addition of 1 µl of 4% acetic acid prepared in assay  
272 buffer for 10 min. The resulting decrease in pH completely inactivated FUT8. To bring the pH back  
273 to neutral, 1 µl of 700 mM NaOH prepared in assay buffer was added to the reaction for 2 min. To  
274 detect the GDP product, 2.5 µl of GDP-Glo™ Glycosyltransferase Assay (Promega) nucleotide  
275 detection reagent was added. Plates were sealed and incubated at room temperature for 60 min.  
276 Chemiluminescence was quantitated on an EnVision Multimode plate reader (Perkin Elmer). Read-  
277 out time was 0.1 s per well. To determine the K<sub>M</sub> of the A2SGP acceptor substrate under these  
278 conditions, reactions were conducted with serial dilutions of A2SGP starting at 80 µM, with 15 µM  
279 GDP-Fuc and 5 nM FUT8. To determine the K<sub>M</sub> of the GDP-Fuc donor substrate under these  
280 conditions, reactions were conducted with serial dilutions of GDP-Fuc starting at 100 µM, with 5 µM  
281 A2SGP and 5 nM FUT8. All data was fit to the appropriate model using Prism 8 (GraphPad).

282

#### 283 *Crystallisation of apo-MmFUT8<sub>68-575</sub>*

284 MmFUT8<sub>68-575</sub> in 50 mM Tris pH 7.4, 300 mM NaCl was concentrated to 15 mg.ml<sup>-1</sup>. A single crystal  
285 was grown over two weeks in a sitting drop at room temperature by mixing 0.5 µl well solution  
286 containing 0.25 M (NH<sub>4</sub>)<sub>2</sub>SO<sub>4</sub> and 10% PEG3350 with 0.5 µl MmFUT8:GDP solution. The crystal  
287 was cryo-protected by supplementing the mother liquor with 25% glycerol and was cryo-cooled using  
288 liquid nitrogen.

289

#### 290 *Crystallisation of MmFUT8<sub>68-575</sub> in complex with GDP*

291 MmFUT8<sub>68-575</sub> in 50 mM Tris pH 7.4, 300 mM NaCl, 1 mM GDP at 0.1 mg.ml<sup>-1</sup> was incubated at 4  
292 °C overnight prior to concentration to a final of 15 mg.ml<sup>-1</sup> MmFUT8<sub>68-575</sub>. A single crystal was grown  
293 over a week in a sitting drop at room temperature by mixing 0.5 µl well solution containing 0.25 M  
294 (NH<sub>4</sub>)<sub>2</sub>SO<sub>4</sub> and 10% PEG3350 with 0.5 µl MmFUT8:GDP solution. The crystal was cryo-protected  
295 by supplementing the mother liquor with 25% glycerol and was cryo-cooled using liquid nitrogen.

296

#### 297 *Crystallisation of apo-HsFUT8<sub>105-575</sub>*

298 HsFUT8<sub>105-575</sub> in 50 mM Tris pH 7.4, 50 mM NaCl was concentrated to 2 mg.ml<sup>-1</sup>. Crystals were  
299 grown over 3 days at 20 °C by mixing 1 µl well solution containing 12% (w/v) PEG 20000, 2.5% (v/v)  
300 DMSO and 0.1 M HEPES, pH 7.5 with 1 µl protein solution. The crystal was cryo-protected by  
301 supplementing the mother liquor with 25% ethylene glycol (v/v) and was cryo-cooled using liquid  
302 nitrogen.

303

#### 304 *Crystallisation of HsFUT8 in complex with A2SGP and GDP*

305 HsFUT8<sub>105-575</sub> in 50 mM Tris pH 7.4, 50 mM NaCl, at 3 mg.ml<sup>-1</sup> was mixed with A2SGP and GDP  
306 (in water) to final concentrations of 2 mg.ml<sup>-1</sup> HsFUT8<sub>105-575</sub>, 0.5 mM A2SGP and 2 mM GDP. The  
307 mixture was incubated on ice for 30 min prior to setting-up crystallisation experiments. A single crystal  
308 was grown over 10 weeks in sitting drops at 8 °C by mixing 1 µl well solution containing 2 M NH<sub>4</sub>SO<sub>4</sub>,  
309 0.2 M NaCl, and 0.1 M sodium cacodylate, pH 6.5, with 1 µl FUT8:A2SGP:GDP solution. The crystal  
310 was cryo-protected by supplementing the mother liquor with 3 M NH<sub>4</sub>SO<sub>4</sub> and was cryo-cooled using  
311 liquid nitrogen.

312

#### 313 *Data collection and structure determination*

314 Data was collected at the Australian Synchrotron (MX2 beamline) and processed using XDS<sup>34</sup>. All  
315 structures were solved by molecular replacement using PHASER<sup>35</sup> using the apo-structure of human  
316 FUT8 as a search model (PDB ID: 2DE0)<sup>21</sup>. The final models were built in Coot<sup>36</sup> and refined with  
317 Phenix<sup>37</sup>. Data collection and refinement statistics are summarized in Table 1. The coordinates have

318 been deposited in the Protein Data Bank (accession codes: 6VLD, 6VLE, 6VLF, and 6VLG). Figures  
319 were prepared using Pymol.

320

### 321 *Small Angle X-ray Scattering and Modelling*

322 Size Exclusion Chromatography-Small Angle X-ray Scattering (SEC-SAXS) was performed using  
323 Coflow apparatus at the Australian Synchrotron<sup>38,39</sup>. Purified HsFUT8 was analysed at a pre-injection  
324 concentration of 100  $\mu\text{M}$ . Chromatography for SEC-SAXS was performed at 22 °C, with a 5/150  
325 Superdex S200 Increase column, at a flow rate of 0.4 ml.min<sup>-1</sup> in 50 mM Tris pH 7.9, 100 mM NaCl,  
326 5% glycerol and 0.2 % sodium azide. The inclusion of glycerol and azide was essential to prevent  
327 capillary fouling due to photo-oxidation of buffer components. Scattering data were collected for 1 s  
328 exposures over a  $q$  range of 0.01 to 0.51  $\text{\AA}^{-1}$ . A buffer blank for each SEC-SAXS run was prepared by  
329 averaging 10-20 frames pre- or post-protein elution. Scattering curves from peaks corresponding to  
330 HsFUT8 were then buffer subtracted, scaled across the elution peak, and compared for inter-particle  
331 effects. Identical curves (5-10) from each elution were then averaged for analysis. Data were analysed  
332 using the ATSAS package, Scatter and SOMO solution modeler<sup>40</sup>.

333

### 334 *Molecular dynamics*

335 The FUT8 monomeric and dimeric systems were created using either one or two copies of chain A  
336 from the HsFUT8 substrate bound structure (6VLD). Each system was solvated in an orthorombic box,  
337 expanding 12  $\text{\AA}$  in each direction from the protein chain(s) and neutralised with  $\text{Na}^+$  and  $\text{Cl}^-$  at 150  
338 mM. These steps were carried out with the AutoPSF Builder in VMD 1.9.4<sup>41</sup>. Molecular dynamics  
339 was simulated using the CHARMM36 force field for proteins<sup>42</sup>, the TIP3P<sup>43</sup> water model, and sodium  
340 and chloride ion parameters from Benoit Roux and Coworkers<sup>44</sup>. Both systems were minimised with  
341 NAMD version 2.13<sup>45</sup>, using a conjugate gradient for 10,000 steps. Next, the systems were annealed  
342 by heating from 60 K to 300 K at a rate of 10 K/12 ps. After annealing, both systems were allowed to  
343 equilibrate at 300 K for 1,000 ps. The annealing and equilibration phases were carried out in a constant  
344 pressure/temperature (NPT) ensemble using the Langevin piston barostat set to 1 atm, and with  
345 harmonic constraints on all non-hydrogen protein atoms. After this the harmonic restraints on the  
346 protein were removed and the monomeric system was simulated for 40 ns and the dimeric system for  
347 30 ns. All simulations were performed using a time step of 2 fs and using periodic boundary conditions  
348 with the Particle Mesh Ewald (PME) method to determine the electrostatics of the system. The aligned  
349 backbone RMSDs of the trajectories were calculated with the RMSDVT Visualizer Tool in VMD and  
350 plotted in Prism 8 (GraphPad).

351

352 **Acknowledgements**

353 We thank the beamline staff at the Australian Synchrotron for help with X-ray data collection, as well  
354 as Dr. Janet Newman and Dr. Bevan Marshall at the Commonwealth Scientific and Industrial Research  
355 Organisation (CSIRO) Collaborative Crystallisation Centre (C3) for assistance in protein  
356 crystallization. This research was undertaken in part using the MX2 beamline at the Australian  
357 Synchrotron, part of ANSTO, and made use of the Australian Cancer Research Foundation (ACRF)  
358 detector. We would like to acknowledge support from: The Walter and Eliza Hall Institute of Medical  
359 Research; National Health and Medical Research Council of Australia (NHMRC) project grant  
360 GNT1139549; the Australian Cancer Research Fund; and a Victorian State Government Operational  
361 Infrastructure support grant.

362

363 **Author contributions**

364 M.A.J. and M.D. performed structural studies; M.A.J. performed MD simulations; J.P.L, R.M. and  
365 A.J. produced recombinant protein; R.W.G. performed SAXS experiments and data analysis; E.D.G.-  
366 B. conceived the project; M.A.J. and E.D.G.-B. co-wrote the manuscript.

367

368 **Conflict of Interests**

369 The authors declare that they have no conflict of interest.

370

371 **References**

- 372 1. Wang, X.; Inoue, S.; Gu, J.; Miyoshi, E.; Noda, K.; Li, W.; Mizuno-Horikawa, Y.; Nakano,  
373 M.; Asahi, M.; Takahashi, M.; Uozumi, N.; Ihara, S.; Lee, S. H.; Ikeda, Y.; Yamaguchi, Y.; Aze,  
374 Y.; Tomiyama, Y.; Fujii, J.; Suzuki, K.; Kondo, A.; Shapiro, S. D.; Lopez-Otin, C.; Kuwaki, T.;  
375 Okabe, M.; Honke, K.; Taniguchi, N., Dysregulation of TGF-beta1 receptor activation leads to  
376 abnormal lung development and emphysema-like phenotype in core fucose-deficient mice.  
377 *Proceedings of the National Academy of Sciences of the United States of America* **2005**, *102* (44),  
378 15791-6.
- 379 2. Lin, H.; Wang, D.; Wu, T.; Dong, C.; Shen, N.; Sun, Y.; Sun, Y.; Xie, H.; Wang, N.;  
380 Shan, L., Blocking core fucosylation of TGF-beta1 receptors downregulates their functions and  
381 attenuates the epithelial-mesenchymal transition of renal tubular cells. *American journal of physiology.*  
382 *Renal physiology* **2011**, *300* (4), F1017-25.
- 383 3. Matsumoto, K.; Yokote, H.; Arao, T.; Maegawa, M.; Tanaka, K.; Fujita, Y.; Shimizu, C.;  
384 Hanafusa, T.; Fujiwara, Y.; Nishio, K., N-Glycan fucosylation of epidermal growth factor receptor

- 385 modulates receptor activity and sensitivity to epidermal growth factor receptor tyrosine kinase  
386 inhibitor. *Cancer science* **2008**, *99* (8), 1611-7.
- 387 4. Li, W.; Yu, R.; Ma, B.; Yang, Y.; Jiao, X.; Liu, Y.; Cao, H.; Dong, W.; Liu, L.; Ma, K.;  
388 Fukuda, T.; Liu, Q.; Ma, T.; Wang, Z.; Gu, J.; Zhang, J.; Taniguchi, N., Core fucosylation of IgG  
389 B cell receptor is required for antigen recognition and antibody production. *Journal of immunology*  
390 (*Baltimore, Md. : 1950*) **2015**, *194* (6), 2596-606.
- 391 5. Fujii, H.; Shinzaki, S.; Iijima, H.; Wakamatsu, K.; Iwamoto, C.; Sobajima, T.; Kuwahara,  
392 R.; Hiyama, S.; Hayashi, Y.; Takamatsu, S.; Uozumi, N.; Kamada, Y.; Tsujii, M.; Taniguchi, N.;  
393 Takehara, T.; Miyoshi, E., Core Fucosylation on T Cells, Required for Activation of T-Cell Receptor  
394 Signaling and Induction of Colitis in Mice, Is Increased in Patients With Inflammatory Bowel Disease.  
395 *Gastroenterology* **2016**, *150* (7), 1620-1632.
- 396 6. Liang, W.; Mao, S.; Sun, S.; Li, M.; Li, Z.; Yu, R.; Ma, T.; Gu, J.; Zhang, J.; Taniguchi,  
397 N.; Li, W., Core Fucosylation of the T Cell Receptor Is Required for T Cell Activation. *Frontiers in*  
398 *immunology* **2018**, *9*, 78.
- 399 7. Iijima, J.; Kobayashi, S.; Kitazume, S.; Kizuka, Y.; Fujinawa, R.; Korekane, H.; Shibata,  
400 T.; Saitoh, S. I.; Akashi-Takamura, S.; Miyake, K.; Miyoshi, E.; Taniguchi, N., Core fucose is  
401 critical for CD14-dependent Toll-like receptor 4 signaling. *Glycobiology* **2017**, *27* (11), 1006-1015.
- 402 8. Nakayama, K.; Wakamatsu, K.; Fujii, H.; Shinzaki, S.; Takamatsu, S.; Kitazume, S.;  
403 Kamada, Y.; Takehara, T.; Taniguchi, N.; Miyoshi, E., Core fucose is essential glycosylation for  
404 CD14-dependent Toll-like receptor 4 and Toll-like receptor 2 signalling in macrophages. *Journal of*  
405 *biochemistry* **2019**, *165* (3), 227-237.
- 406 9. Okada, M.; Chikuma, S.; Kondo, T.; Hibino, S.; Machiyama, H.; Yokosuka, T.; Nakano,  
407 M.; Yoshimura, A., Blockage of Core Fucosylation Reduces Cell-Surface Expression of PD-1 and  
408 Promotes Anti-tumor Immune Responses of T Cells. *Cell reports* **2017**, *20* (5), 1017-1028.
- 409 10. Okazaki, A.; Shoji-Hosaka, E.; Nakamura, K.; Wakitani, M.; Uchida, K.; Kakita, S.;  
410 Tsumoto, K.; Kumagai, I.; Shitara, K., Fucose depletion from human IgG1 oligosaccharide enhances  
411 binding enthalpy and association rate between IgG1 and FcγRIIIa. *J Mol Biol* **2004**, *336* (5),  
412 1239-1249.
- 413 11. Shields, R. L.; Lai, J.; Keck, R.; O'Connell, L. Y.; Hong, K.; Meng, Y. G.; Weikert, S. H.  
414 A.; Presta, L. G., Lack of fucose on human IgG1 N-linked oligosaccharide improves binding to human  
415 FcγRIII and antibody-dependent cellular toxicity. *The Journal of biological chemistry* **2002**,  
416 *277* (30), 26733-26740.

- 417 12. Niwa, R.; Natsume, A.; Uehara, A.; Wakitani, M.; Iida, S.; Uchida, K.; Satoh, M.; Shitara,  
418 K., IgG subclass-independent improvement of antibody-dependent cellular cytotoxicity by fucose  
419 removal from Asn297-linked oligosaccharides. *J Immunol Methods* **2005**, *306* (1-2), 151-160.
- 420 13. Manabe, Y.; Marchetti, R.; Takakura, Y.; Nagasaki, M.; Nihei, W.; Takebe, T.; Tanaka,  
421 K.; Kabayama, K.; Chiodo, F.; Hanashima, S.; Kamada, Y.; Miyoshi, E.; Dulal, H. P.; Yamaguchi,  
422 Y.; Adachi, Y.; Ohno, N.; Tanaka, H.; Silipo, A.; Fukase, K.; Molinaro, A., The Core Fucose on an  
423 IgG Antibody is an Endogenous Ligand of Dectin-1. *Angew Chem Int Ed Engl* **2019**, *58* (51), 18697-  
424 18702.
- 425 14. Wang, X.; Fukuda, T.; Li, W.; Gao, C.-X.; Kondo, A.; Matsumoto, A.; Miyoshi, E.;  
426 Taniguchi, N.; Gu, J., Requirement of Fut8 for the expression of vascular endothelial growth factor  
427 receptor-2: a new mechanism for the emphysema-like changes observed in Fut8-deficient mice.  
428 *Journal of biochemistry* **2009**, *145* (5), 643-651.
- 429 15. Fukuda, T.; Hashimoto, H.; Okayasu, N.; Kameyama, A.; Onogi, H.; Nakagawasai, O.;  
430 Nakazawa, T.; Kurosawa, T.; Hao, Y.; Isaji, T.; Tadano, T.; Narimatsu, H.; Taniguchi, N.; Gu, J.,  
431 Alpha1,6-fucosyltransferase-deficient mice exhibit multiple behavioral abnormalities associated with  
432 a schizophrenia-like phenotype: importance of the balance between the dopamine and serotonin  
433 systems. *The Journal of biological chemistry* **2011**, *286* (21), 18434-43.
- 434 16. Ng, B. G.; Xu, G.; Chandy, N.; Steyermark, J.; Shinde, D. N.; Radtke, K.; Raymond, K.;  
435 Lebrilla, C. B.; AlAsmari, A.; Suchy, S. F.; Powis, Z.; Faqeih, E. A.; Berry, S. A.; Kronn, D. F.;  
436 Freeze, H. H., Biallelic Mutations in FUT8 Cause a Congenital Disorder of Glycosylation with  
437 Defective Fucosylation. *American journal of human genetics* **2018**, *102* (1), 188-195.
- 438 17. Herrera, H.; Dilday, T.; Uber, A.; Scott, D.; Zambrano, J. N.; Wang, M.; Angel, P. M.;  
439 Mehta, A. S.; Drake, R. R.; Hill, E. G.; Yeh, E. S., Core-Fucosylated Tetra-Antennary N-Glycan  
440 Containing A Single N-Acetylglucosamine Branch Is Associated with Poor Survival Outcome in Breast  
441 Cancer. *International journal of molecular sciences* **2019**, *20* (10), 2528.
- 442 18. Agrawal, P.; Fontanals-Cirera, B.; Sokolova, E.; Jacob, S.; Vaiana, C. A.; Argibay, D.;  
443 Davalos, V.; McDermott, M.; Nayak, S.; Darvishian, F.; Castillo, M.; Ueberheide, B.; Osman, I.;  
444 Fenyö, D.; Mahal, L. K.; Hernando, E., A Systems Biology Approach Identifies FUT8 as a Driver of  
445 Melanoma Metastasis. *Cancer cell* **2017**, *31* (6), 804-819.e7.
- 446 19. Tu, C.-F.; Wu, M.-Y.; Lin, Y.-C.; Kannagi, R.; Yang, R.-B., FUT8 promotes breast cancer  
447 cell invasiveness by remodeling TGF- $\beta$  receptor core fucosylation. *Breast cancer research : BCR*  
448 **2017**, *19* (1), 111-111.
- 449 20. Aoyagi, Y.; Isemura, M.; Suzuki, Y.; Sekine, C.; Soga, K.; Ozaki, T.; Ichida, F., Fucosylated  
450 alpha-fetoprotein as marker of early hepatocellular carcinoma. *Lancet* **1985**, *2* (8468), 1353-1354.

- 451 21. Ihara, H.; Ikeda, Y.; Toma, S.; Wang, X.; Suzuki, T.; Gu, J.; Miyoshi, E.; Tsukihara, T.;  
452 Honke, K.; Matsumoto, A.; Nakagawa, A.; Taniguchi, N., Crystal structure of mammalian alpha1,6-  
453 fucosyltransferase, FUT8. *Glycobiology* **2007**, *17* (5), 455-66.
- 454 22. Kotzler, M. P.; Blank, S.; Bantleon, F. I.; Wienke, M.; Spillner, E.; Meyer, B., Donor assists  
455 acceptor binding and catalysis of human alpha1,6-fucosyltransferase. *ACS chemical biology* **2013**, *8*  
456 (8), 1830-40.
- 457 23. Kotzler, M. P.; Blank, S.; Bantleon, F. I.; Spillner, E.; Meyer, B., Donor substrate binding  
458 and enzymatic mechanism of human core alpha1,6-fucosyltransferase (FUT8). *Biochimica et*  
459 *biophysica acta* **2012**, *1820* (12), 1915-25.
- 460 24. Ihara, H.; Ikeda, Y.; Taniguchi, N., Reaction mechanism and substrate specificity for  
461 nucleotide sugar of mammalian alpha1,6-fucosyltransferase--a large-scale preparation and  
462 characterization of recombinant human FUT8. *Glycobiology* **2006**, *16* (4), 333-42.
- 463 25. Takahashi, T.; Ikeda, Y.; Tateishi, A.; Yamaguchi, Y.; Ishikawa, M.; Taniguchi, N., A  
464 sequence motif involved in the donor substrate binding by alpha1,6-fucosyltransferase: the role of the  
465 conserved arginine residues. *Glycobiology* **2000**, *10* (5), 503-510.
- 466 26. Urbanowicz, B. R.; Bharadwaj, V. S.; Alahuhta, M.; Peña, M. J.; Lunin, V. V.; Bomble, Y.  
467 J.; Wang, S.; Yang, J.-Y.; Tuomivaara, S. T.; Himmel, M. E.; Moremen, K. W.; York, W. S.;  
468 Crowley, M. F., Structural, mutagenic and in silico studies of xyloglucan fucosylation in *Arabidopsis*  
469 *thaliana* suggest a water-mediated mechanism. *The Plant Journal* **2017**, *91* (6), 931-949.
- 470 27. Brzezinski, K.; Dauter, Z.; Jaskolski, M., Structures of NodZ [alpha]1,6-fucosyltransferase in  
471 complex with GDP and GDP-fucose. *Acta Crystallographica Section D* **2012**, *68* (2), 160-168.
- 472 28. Lira-Navarrete, E.; Valero-González, J.; Villanueva, R.; Martínez-Júlvez, M.; Tejero, T.;  
473 Merino, P.; Panjikar, S.; Hurtado-Guerrero, R., Structural Insights into the Mechanism of Protein O-  
474 Fucosylation. *PloS one* **2011**, *6* (9), e25365.
- 475 29. Li, Z.; Han, K.; Pak, J. E.; Satkunarajah, M.; Zhou, D.; Rini, J. M., Recognition of EGF-like  
476 domains by the Notch-modifying O-fucosyltransferase POFUT1. *Nature chemical biology* **2017**, *13*  
477 (7), 757-763.
- 478 30. Valero-González, J.; Leonhard-Melief, C.; Lira-Navarrete, E.; Jiménez-Osés, G.; Hernández-  
479 Ruiz, C.; Pallarés, M. C.; Yruela, I.; Vasudevan, D.; Lostao, A.; Corzana, F.; Takeuchi, H.;  
480 Haltiwanger, R. S.; Hurtado-Guerrero, R., A proactive role of water molecules in acceptor recognition  
481 by protein O-fucosyltransferase 2. *Nature chemical biology* **2016**, *12* (4), 240-246.
- 482 31. Tseng, T. H.; Lin, T. W.; Chen, C. Y.; Chen, C. H.; Lin, J. L.; Hsu, T. L.; Wong, C. H.,  
483 Substrate Preference and Interplay of Fucosyltransferase 8 and N-Acetylglucosaminyltransferases.  
484 *Journal of the American Chemical Society* **2017**, *139* (28), 9431-9434.

- 485 32. Calderon, A. D.; Liu, Y.; Li, X.; Wang, X.; Chen, X.; Li, L.; Wang, P. G., Substrate  
486 specificity of FUT8 and chemoenzymatic synthesis of core-fucosylated asymmetric N-glycans.  
487 *Organic & biomolecular chemistry* **2016**, *14* (17), 4027-31.
- 488 33. Kaminska, J.; Glick, M. C.; Koscielak, J., Purification and characterization of GDP L -Fuc:  
489 N-acetyl  $\beta$  D -glucosaminide  $\alpha$ 1 $\rightarrow$ 6fucosyltransferase from human blood platelets. *Glycoconjugate*  
490 *journal* **1998**, *15* (8), 783-788.
- 491 34. Kabsch, W., XDS. *Acta Crystallogr D Biol Crystallogr* **2010**, *66* (Pt 2), 125-132.
- 492 35. Storoni, L. C.; McCoy, A. J.; Read, R. J., Likelihood-enhanced fast rotation functions. *Acta*  
493 *Crystallogr D Biol Crystallogr* **2004**, *60* (Pt 3), 432-438.
- 494 36. Emsley, P.; Cowtan, K., Coot: model-building tools for molecular graphics. *Acta Crystallogr*  
495 *D Biol Crystallogr* **2004**, *60* (Pt 12 Pt 1), 2126-2132.
- 496 37. Adams, P. D.; Afonine, P. V.; Bunkóczi, G.; Chen, V. B.; Davis, I. W.; Echols, N.; Headd,  
497 J. J.; Hung, L.-W.; Kapral, G. J.; Grosse-Kunstleve, R. W.; McCoy, A. J.; Moriarty, N. W.; Oeffner,  
498 R.; Read, R. J.; Richardson, D. C.; Richardson, J. S.; Terwilliger, T. C.; Zwart, P. H., PHENIX: a  
499 comprehensive Python-based system for macromolecular structure solution. *Acta Crystallogr D Biol*  
500 *Crystallogr* **2010**, *66* (Pt 2), 213-221.
- 501 38. Kirby, N.; Cowieson, N.; Hawley, A. M.; Mudie, S. T.; McGillivray, D. J.; Kusel, M.;  
502 Samardzic-Boban, V.; Ryan, T. M., Improved radiation dose efficiency in solution SAXS using a  
503 sheath flow sample environment. *Acta Crystallogr D Struct Biol* **2016**, *72* (Pt 12), 1254-1266.
- 504 39. Kirby, N. M.; Mudie, S. T.; Hawley, A. M.; Cookson, D. J.; Mertens, H. D. T.; Cowieson,  
505 N.; Samardzic-Boban, V., A low-background-intensity focusing small-angle X-ray scattering  
506 undulator beamline. *Journal of Applied Crystallography* **2013**, *46* (6), 1670-1680.
- 507 40. Konarev, P. V.; Volkov, V. V.; Sokolova, A. V.; Koch, M. H. J.; Svergun, D. I., PRIMUS: a  
508 Windows PC-based system for small-angle scattering data analysis. *Journal of Applied*  
509 *Crystallography* **2003**, *36* (5), 1277-1282.
- 510 41. Humphrey, W.; Dalke, A.; Schulten, K., VMD: visual molecular dynamics. *J Mol Graph* **1996**,  
511 *14* (1), 33-28.
- 512 42. Huang, J.; MacKerell, A. D., Jr., CHARMM36 all-atom additive protein force field: validation  
513 based on comparison to NMR data. *J Comput Chem* **2013**, *34* (25), 2135-2145.
- 514 43. Jorgensen, W. L.; Chandrasekhar, J.; Madura, J. D.; Impey, R. W.; Klein, M. L., Comparison  
515 of simple potential functions for simulating liquid water. *The Journal of Chemical Physics* **1983**, *79*  
516 (2), 926-935.
- 517 44. Beglov, D.; Roux, B., Finite representation of an infinite bulk system: Solvent boundary  
518 potential for computer simulations. *The Journal of Chemical Physics* **1994**, *100* (12), 9050-9063.



519 45. Phillips, J. C.; Braun, R.; Wang, W.; Gumbart, J.; Tajkhorshid, E.; Villa, E.; Chipot, C.;  
520 Skeel, R. D.; Kalé, L.; Schulten, K., Scalable molecular dynamics with NAMD. *J Comput Chem* **2005**,  
521 26 (16), 1781-1802.

522

523

524 **Figures and legends**

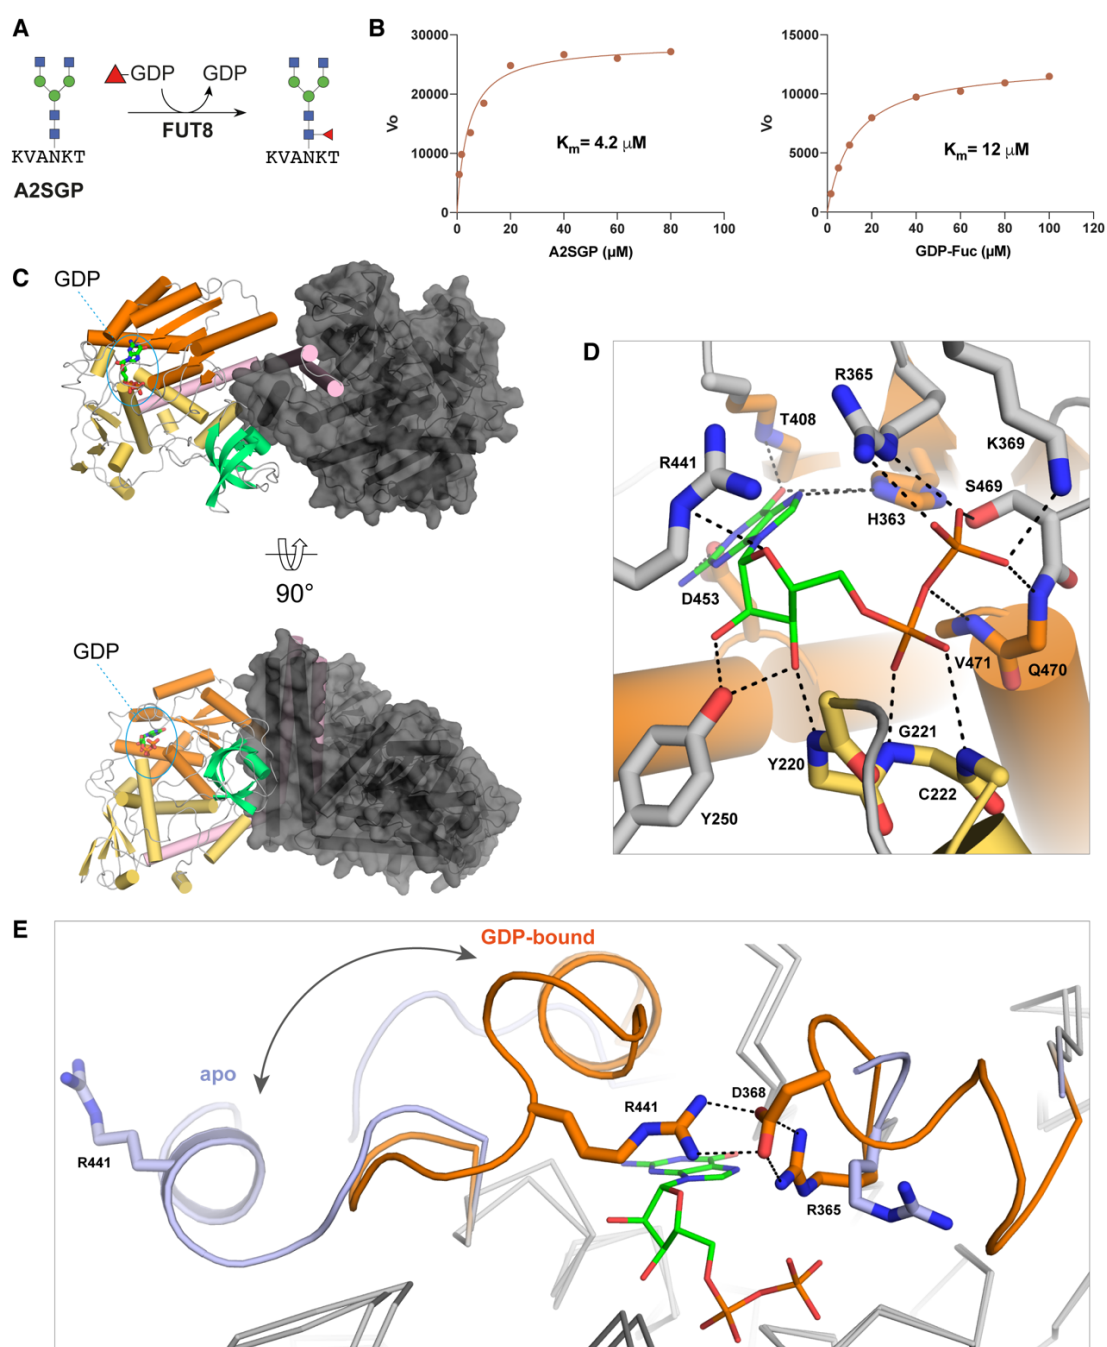

525

526 **Figure 1.** Structures of mouse and human FUT8 with and without GDP bound. (A) HsFUT8 is active  
 527 and has  $K_M$  values that are in agreement with those previously reported<sup>24</sup>. (B) The domain structure of  
 528 FUT8 (coiled coil = pink, Rossman = orange and yellow, SH3 = teal) and the interactions between  
 529 each the two molecules in the asymmetric unit. (C) The hydrogen-bonding interactions between  
 530 MmFUT8 and GDP (see also Figure S4). (D) An overlay of the GDP-binding sites of apo-HsFUT8  
 531 (blue) and GDP-bound MmFUT8 (orange), illustrating the conformational changes observed for loops  
 532 A and B. A salt bridge between D368 and R365/441 from loops A and B, respectively, forms upon  
 533 encapsulation of GDP.

534

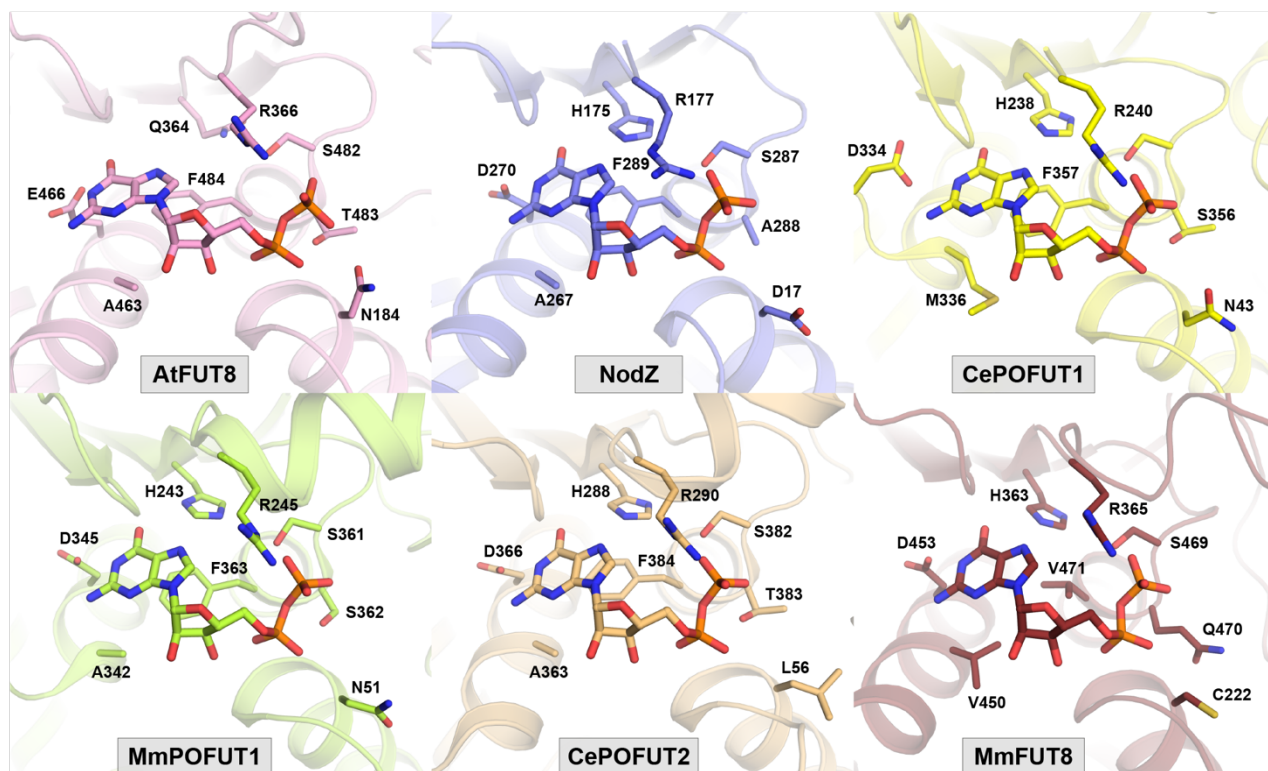

**Figure 2.** Conserved residues defining the GDP-binding site across all known structures of fucosyltransferases in complex with GDP (PDB ID for AtFUT1: 5KWK<sup>26</sup>; NodZ: 3SIW<sup>27</sup>; CePOFUT1: 3ZY3<sup>28</sup>; MmPOFUT1: 5KXQ<sup>29</sup>; CePOFUT2: 5FOE<sup>30</sup>; MmFUT8: 6VLG).

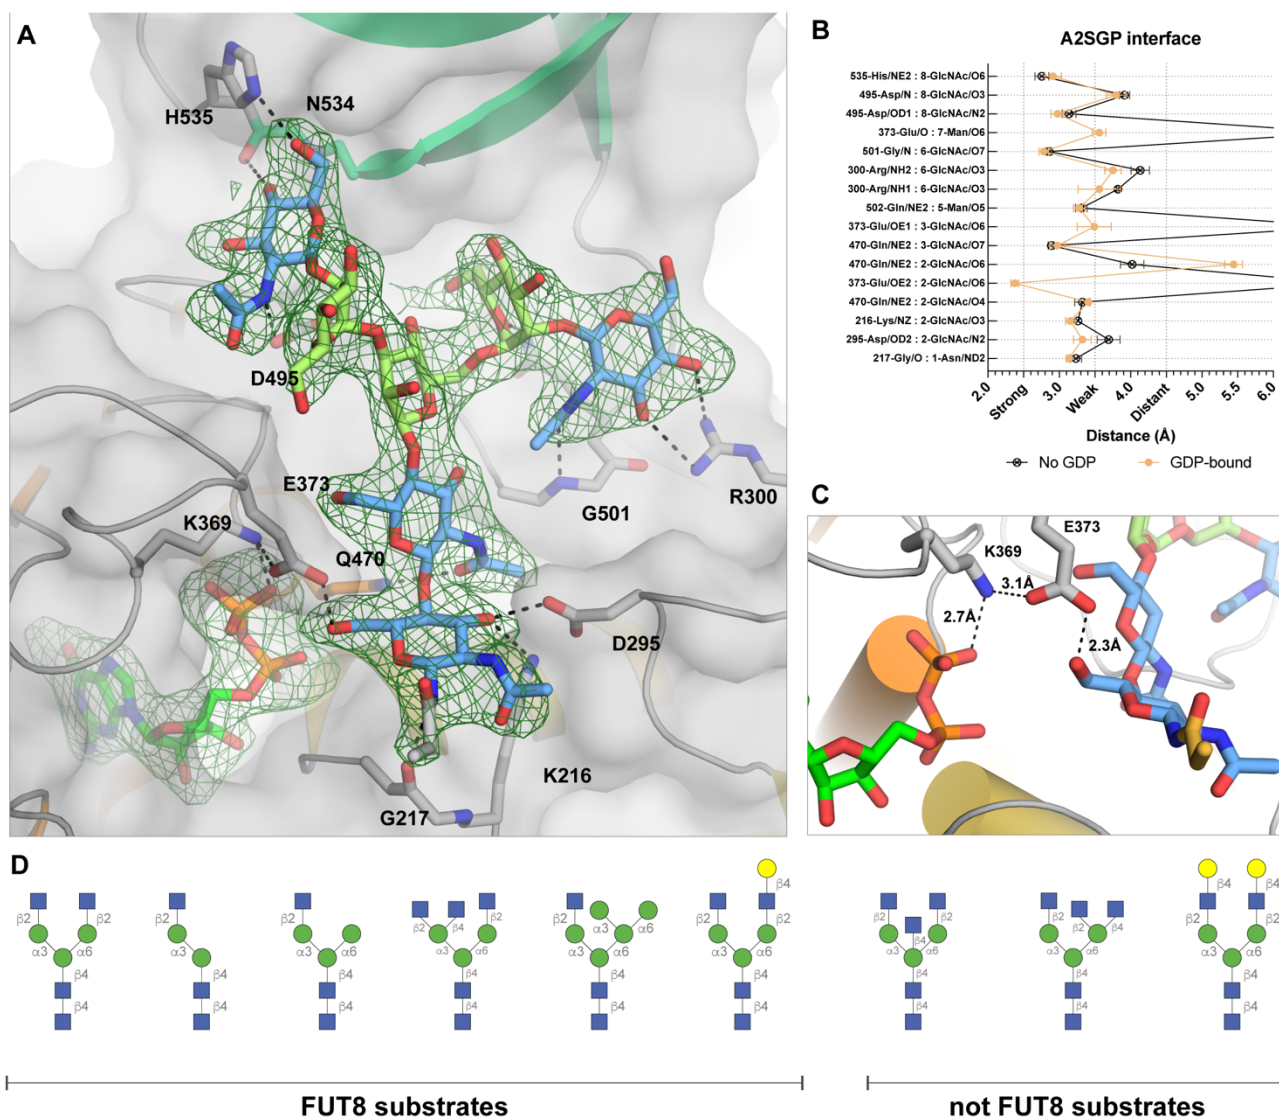

540

541 **Figure 3.** Acceptor substrate recognition by FUT8. (A) Interactions between FUT8 and the A2SGP  
 542 N-glycan acceptor substrate, with an Fo-Fc omit map contoured at 1.5 $\sigma$  around the N-glycan and GDP.  
 543 Residues making hydrogen bond interaction to the N-glycan are indicated. SH3 domain is coloured in  
 544 teal. (B) A list of the interactions and hydrogen bond distances between A2SGP and FUT8. (C) A  
 545 close up of the active site illustrating a potential role for E373 and K369 as a proton relay to facilitate  
 546 electrophilic migration of fucose from GDP-Fuc to the 6-hydroxyl group of the innermost GlcNAc.  
 547 (D) A selection of N-glycans known to be modified or not modified by FUT8<sup>31, 32</sup>, for comparison to  
 548 the structure depicted in (A).

549

550

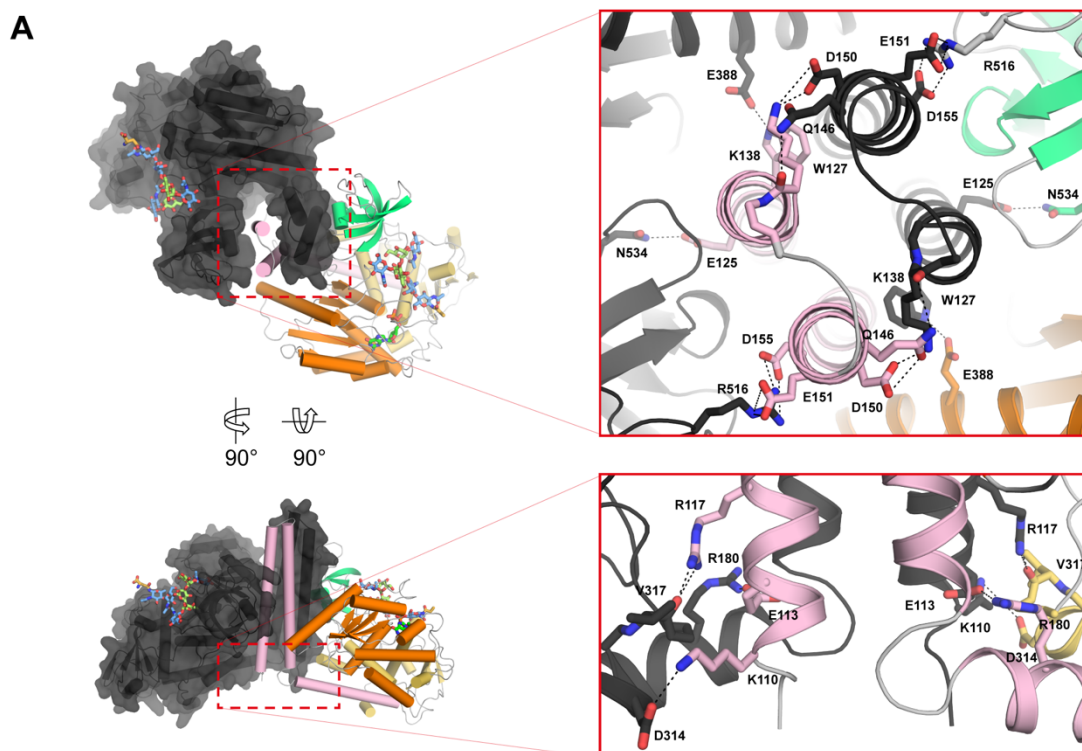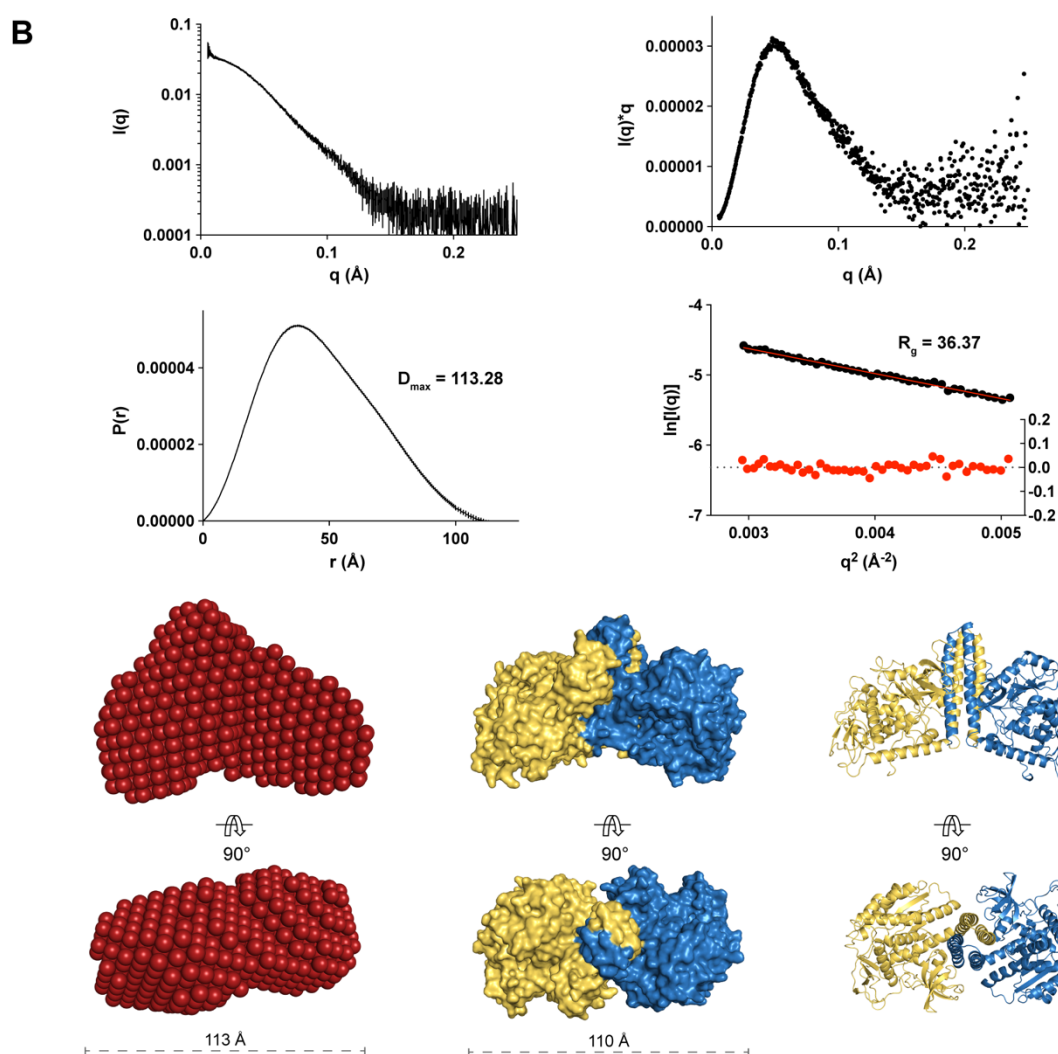

552 **Figure 4.** Interactions between the N-terminal coiled coil domains drive FUT8 dimerisation in  
553 solution. (A) Self-association of the N-terminal helices of FUT8 creates a four helix bundle that buries  
554 hydrophobic residues and creates multiple inter-chain salt bridges. (B) Intensity plot of FUT8 SAXS  
555 scattering (top left), Kratky plot derived from FUT8 scattering showing that it forms a compact particle  
556 in solution (top right), P(r) and Guinier plots indicating that FUT8 has a maximum dimension of 113.28  
557 Å in solution (bottom left) and a radius of gyration of 36.37 Å (bottom right). (C) A bead model of  
558 FUT8 in solution generated from solution scattering data (left), corresponds well to the dimer observed  
559 in the FUT8 crystal structure shown as a surface (middle) and cartoon (right) view.  
560

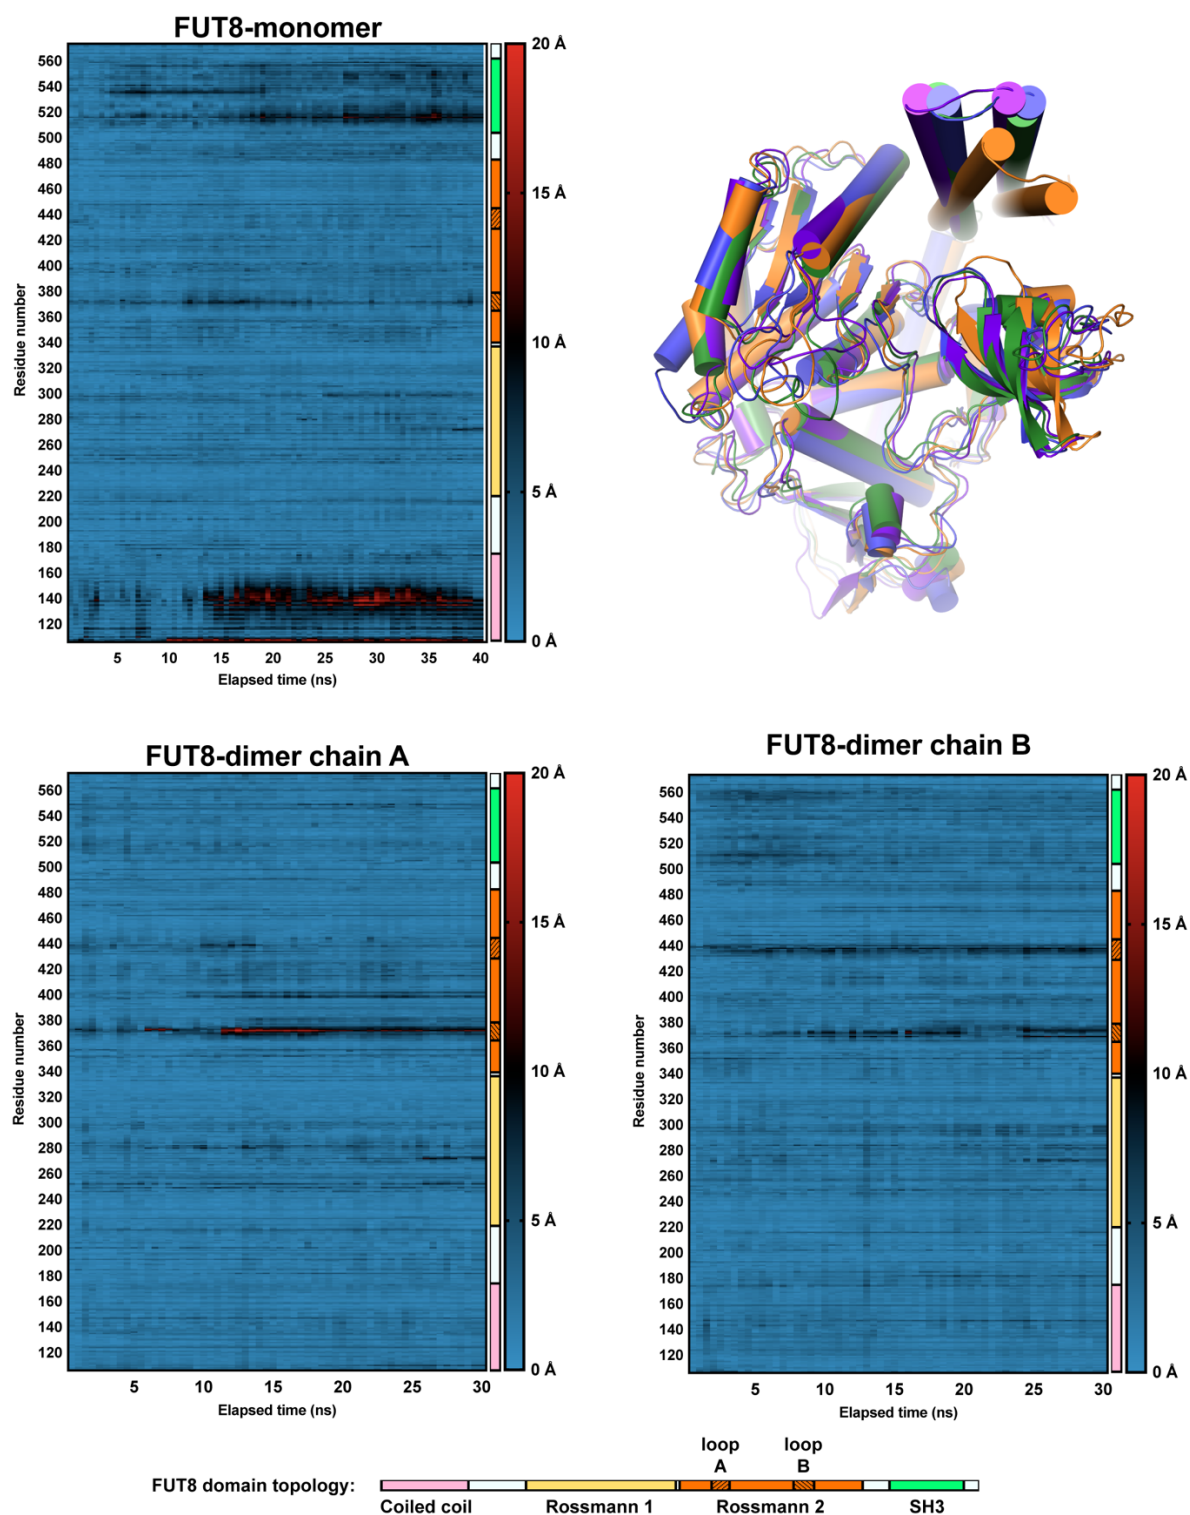

561

562 **Figure 5.** Heatmaps illustrating the displacement experienced by each amino acid in FUT8 during 30-  
563 40 ns of molecular dynamics simulation. The domain that each residue belongs to is illustrated for  
564 reference, with the shaded regions of the second Rossmann domain denoting the mobile GDP-binding  
565 loops A and B of the active site. An overlay of each monomer at t = 0 ns and the end points is provided  
566 loops A and B of the active site. An overlay of each monomer at t = 0 ns and the end points is provided  
567 in the top right (green is at t = 0 ns, orange is monomer at t = 40 ns, blue and purple are both dimer  
chains at t = 30 ns).

568 **Table 1.** Refinement statistics for the structures reported in this study.

| Structure                                              | apo-MmFUT8             | MmFUT8-GDP             | apo-HsFUT8             | HsFUT8-GDP-A2SGP       |
|--------------------------------------------------------|------------------------|------------------------|------------------------|------------------------|
| PDB ID:                                                | 6VLF                   | 6VLG                   | 6VLE                   | 6VLD                   |
| Space group                                            | C 1 2 1                | P 6 <sub>5</sub> 2 2   | P 1 2 <sub>1</sub> 1   | C 1 2 1                |
| No of protein chains in AU                             | 2                      | 4                      | 2                      | 4                      |
| Cell dimensions                                        |                        |                        |                        |                        |
| <i>a, b, c</i> (Å)                                     | 184.87, 71.34, 126.95  | 150.82, 150.82, 472.14 | 95.02, 62.20, 109.90   | 208.31, 68.45, 249.98  |
| <i>a, b, g</i> (°)                                     | 90, 126.08, 90         | 90, 90, 120            | 90, 90.88, 90          | 90, 111.21, 90         |
| Wavelength (Å)                                         | 0.9537                 | 0.9537                 | 0.9537                 | 0.9537                 |
| Resolution (Å)*                                        | 49.20-1.80 (1.83-1.80) | 49.37-2.50 (2.54-2.50) | 47.50-2.28 (2.34-2.28) | 46.65-2.28 (2.32-2.28) |
| <i>R</i> <sub>sym</sub> or <i>R</i> <sub>merge</sub> * | 0.047 (1.167)          | 0.150 (0.664)          | 0.120 (1.520)          | 0.095 (1.347)          |
| <i>R</i> <sub>pim</sub> *                              | 0.044 (1.055)          | 0.066 (0.366)          | 0.092 (1.143)          | 0.066 (0.949)          |
| <i>I</i> / <i>sI</i> *                                 | 10.6 (0.9)             | 9.5 (2.0)              | 8.2 (1.0)              | 10.2 (1.1)             |
| CC(1/2)                                                | 0.999 (0.463)          | 0.995 (0.811)          | 0.997 (0.630)          | 0.998 (0.435)          |
| Completeness (%)*                                      | 99.6 (99.7)            | 98.8 (85.8)            | 99.8 (100)             | 99.9 (99.9)            |
| Redundancy*                                            | 3.4 (3.5)              | 10.4 (6.2)             | 5.0 (5.1)              | 5.7 (5.6)              |
| Wilson B-factor (Å <sup>2</sup> )                      | 31.78                  | 33.56                  | 40.13                  | 47.03                  |
| <b>Refinement</b>                                      |                        |                        |                        |                        |
| Resolution (Å)                                         | 46.42-1.80             | 49.37-2.50             | 47.26-2.28             | 48.66-2.28             |
| No. reflections                                        | 123,188                | 108,979                | 58,849                 | 150,217                |
| <i>R</i> <sub>work</sub> / <i>R</i> <sub>free</sub>    | 0.1842 / 0.2082        | 0.1822 / 0.2273        | 0.2019 / 0.2340        | 0.1914 / 0.2239        |
| No. non-hydrogen atoms                                 |                        |                        |                        |                        |
| Protein                                                | 7384                   | 15248                  | 7492                   | 15083                  |
| GDP                                                    | n/a                    | 112                    | n/a                    | 56                     |
| A2SGP                                                  | n/a                    | n/a                    | n/a                    | 392                    |
| Water                                                  | 626                    | 925                    | 376                    | 628                    |
| <i>B</i> -factors                                      |                        |                        |                        |                        |
| Protein                                                | 43.4                   | 43.3                   | 50.9                   | 64.2                   |
| GDP                                                    | n/a                    | 32.0                   | n/a                    | 56.2                   |
| A2SGP                                                  | n/a                    | n/a                    | n/a                    | 65.6                   |
| Water                                                  | 47.9                   | 43.0                   | 48.5                   | 55.3                   |
| R.m.s. deviations                                      |                        |                        |                        |                        |
| Bond lengths (Å)                                       | 0.005                  | 0.003                  | 0.001                  | 0.002                  |
| Bond angle (°)                                         | 0.72                   | 0.61                   | 0.417                  | 0.482                  |
| Ramachandran plot (%)                                  |                        |                        |                        |                        |
| Favored                                                | 97.62                  | 96.73                  | 97.8                   | 96.58                  |
| Allowed                                                | 2.38                   | 3.22                   | 2.2                    | 3.42                   |
| Disallowed                                             | 0                      | 0                      | 0                      | 0.05                   |

569
